# Supplementary material
Source: PubMed Central journal article supplement (PMC6141348)
Supplement: NIHMS986065-supplement-S5.pdf [file NIHMS986065-supplement-S5.pdf]

| SVM Weight Ranking               |         | T Statistic Ranking              |         | ΔFC Metric                       |         |
|----------------------------------|---------|----------------------------------|---------|----------------------------------|---------|
| Left Pericalcarine               | 0.0061  | Right Lingual                    | 1.3128  | Left Pericalcarine               | 0.2868  |
| Right Lingual                    | 0.0046  | Left Pericalcarine               | 1.1220  | Right Lingual                    | 0.2642  |
| Left Lingual                     | 0.0045  | Left Lingual                     | 1.1046  | Left Lingual                     | 0.2324  |
| Left Postcentral                 | 0.0043  | Left Temporal Pole               | 0.9067  | Right Pericalcarine              | 0.2236  |
| Left Cuneus                      | 0.0034  | Right Pericalcarine              | 0.8287  | Left Postcentral                 | 0.1734  |
| Right Cuneus                     | 0.0030  | Left Postcentral                 | 0.6967  | Left Temporal Pole               | 0.1582  |
| Right Frontal Pole               | 0.0029  | Right Frontal Pole               | 0.6718  | Right Frontal Pole               | 0.1359  |
| Right Pericalcarine              | 0.0026  | Right Parahippocampal            | 0.6243  | Right Parahippocampal            | 0.1196  |
| Right Precentral                 | 0.0025  | Left Transverse Temporal         | 0.6221  | Right Fusiform                   | 0.1104  |
| Left Temporal Pole               | 0.0021  | Right Fusiform                   | 0.5884  | Left Transverse Temporal         | 0.1091  |
| Left Precentral                  | 0.0019  | Left Parahippocampal             | 0.5511  | Left Cuneus                      | 0.1004  |
| Left Rostral Middle Frontal      | 0.0018  | Left Isthmus Cingulate           | 0.4948  | Right Cuneus                     | 0.0952  |
| Left Pars Opercularis            | 0.0015  | Left Cuneus                      | 0.4509  | Left Isthmus Cingulate           | 0.0940  |
| Right Pars Opercularis           | 0.0015  | Right Transverse Temporal        | 0.4104  | Right Lateral Occipital          | 0.0912  |
| Right Caudal Middle Frontal      | 0.0015  | Left Entorhinal                  | 0.3556  | Left Parahippocampal             | 0.0908  |
| Left Entorhinal                  | 0.0013  | Right Inferior Temporal          | 0.3507  | Left Rostral Middle Frontal      | 0.0783  |
| Right Lateral Occipital          | 0.0012  | Right Cuneus                     | 0.3471  | Right Transverse Temporal        | 0.0728  |
| Right Parahippocampal            | 0.0011  | Right Lateral Occipital          | 0.3361  | Left Precentral                  | 0.0721  |
| Right Fusiform                   | 0.0011  | Left Rostral Middle Frontal      | 0.3128  | Left Pars Opercularis            | 0.0647  |
| Left Transverse Temporal         | 0.0010  | Left Precentral                  | 0.2722  | Right Precentral                 | 0.0643  |
| Right Inferior Temporal          | 0.0009  | Right Precentral                 | 0.2341  | Left Entorhinal                  | 0.0599  |
| Right Paracentral                | 0.0009  | Left Pars Opercularis            | 0.2287  | Right Inferior Temporal          | 0.0565  |
| Left Caudal Middle Frontal       | 0.0008  | Left Superior Temporal           | 0.2231  | Right Pars Opercularis           | 0.0502  |
| Right Precuneus                  | 0.0007  | Left Middle Temporal             | 0.2216  | Right Isthmus Cingulate          | 0.0459  |
| Left Middle Temporal             | 0.0007  | Right Isthmus Cingulate          | 0.2206  | Left Lateral Occipital           | 0.0452  |
| Left Isthmus Cingulate           | 0.0005  | Right Pars Opercularis           | 0.2019  | Right Postcentral                | 0.0451  |
| Right Postcentral                | 0.0005  | Right Precuneus                  | 0.1846  | Left Middle Temporal             | 0.0416  |
| Left Parahippocampal             | 0.0004  | Right Postcentral                | 0.1831  | Right Precuneus                  | 0.0414  |
| Right Transverse Temporal        | 0.0003  | Right Superior Temporal          | 0.1629  | Left Superior Temporal           | 0.0413  |
| Right Superior Temporal          | 0.0002  | Left Lateral Occipital           | 0.1587  | Right Paracentral                | 0.0350  |
| Left Superior Temporal           | 0.0002  | Right Paracentral                | 0.1255  | Right Superior Temporal          | 0.0307  |
| Left Precuneus                   | 0.0000  | Left Precuneus                   | 0.1141  | Left Fusiform                    | 0.0301  |
| Left Supramarginal               | -0.0001 | Left Fusiform                    | 0.1047  | Left Precuneus                   | 0.0227  |
| Right Isthmus Cingulate          | -0.0002 | Left Caudal Middle Frontal       | 0.0058  | Left Caudal Middle Frontal       | 0.0111  |
| Right Rostral Middle Frontal     | -0.0002 | Left Inferior Temporal           | -0.0205 | Right Entorhinal                 | -0.0025 |
| Left Superior Parietal           | -0.0003 | Left Paracentral                 | -0.0353 | Left Inferior Temporal           | -0.0038 |
| Right Entorhinal                 | -0.0005 | Right Entorhinal                 | -0.0636 | Left Paracentral                 | -0.0094 |
| Left Inferior Temporal           | -0.0005 | Right Middle Temporal            | -0.1139 | Right Middle Temporal            | -0.0249 |
| Left Lateral Occipital           | -0.0006 | Right Caudal Middle Frontal      | -0.1305 | Right Caudal Middle Frontal      | -0.0293 |
| Left Paracentral                 | -0.0008 | Left Supramarginal               | -0.1367 | Left Supramarginal               | -0.0336 |
| Right Middle Temporal            | -0.0008 | Left Pars Triangularis           | -0.1410 | Left Pars Triangularis           | -0.0344 |
| Left Fusiform                    | -0.0011 | Right Rostral Middle Frontal     | -0.1726 | Right Rostral Middle Frontal     | -0.0448 |
| Left Superior Frontal            | -0.0013 | Left Posterior Cingulate         | -0.2676 | Right Insula                     | -0.0534 |
| Left Pars Triangularis           | -0.0014 | Left Medial Orbitofrontal        | -0.2986 | Left Medial Orbitofrontal        | -0.0534 |
| Right Medial Orbitofrontal       | -0.0015 | Left Superior Frontal            | -0.3182 | Left Posterior Cingulate         | -0.0586 |
| Right Superior Parietal          | -0.0016 | Right Insula                     | -0.3302 | Right Medial Orbitofrontal       | -0.0610 |
| Right Insula                     | -0.0016 | Right Posterior Cingulate        | -0.3683 | Left Frontal Pole                | -0.0752 |
| Left Inferior Parietal           | -0.0016 | Left Superior Parietal           | -0.3703 | Right Posterior Cingulate        | -0.0779 |
| Left Posterior Cingulate         | -0.0017 | Right Medial Orbitofrontal       | -0.3718 | Left Superior Frontal            | -0.0800 |
| Left Frontal Pole                | -0.0017 | Right Superior Frontal           | -0.4097 | Left Insula                      | -0.0820 |
| Left Insula                      | -0.0018 | Left Frontal Pole                | -0.4347 | Left Lateral Orbitofrontal       | -0.0822 |
| Right Pars Orbitalis             | -0.0018 | Left Lateral Orbitofrontal       | -0.4372 | Right Superior Frontal           | -0.0940 |
| Right Superior Frontal           | -0.0019 | Left Inferior Parietal           | -0.4866 | Right Temporal Pole              | -0.1020 |
| Right Supramarginal              | -0.0020 | Left Insula                      | -0.4996 | Right Pars Orbitalis             | -0.1037 |
| Left Lateral Orbitofrontal       | -0.0021 | Right Supramarginal              | -0.5188 | Left Inferior Parietal           | -0.1110 |
| Left Medial Orbitofrontal        | -0.0021 | Right Pars Orbitalis             | -0.5469 | Left Superior Parietal           | -0.1180 |
| Right Posterior Cingulate        | -0.0024 | Right Temporal Pole              | -0.5738 | Right Lateral Orbitofrontal      | -0.1224 |
| Right Inferior Parietal          | -0.0025 | Right Lateral Orbitofrontal      | -0.6534 | Right Supramarginal              | -0.1249 |
| Right Lateral Orbitofrontal      | -0.0029 | Right Superior Parietal          | -0.6686 | Right Caudal Anterior Cingulate  | -0.1569 |
| Right Caudal Anterior Cingulate  | -0.0034 | Right Inferior Parietal          | -0.7150 | Right Inferior Parietal          | -0.1799 |
| Left Rostral Anterior Cingulate  | -0.0043 | Right Caudal Anterior Cingulate  | -0.7866 | Right Superior Parietal          | -0.1909 |
| Right Rostral Anterior Cingulate | -0.0046 | Left Pars Orbitalis              | -0.9185 | Left Pars Orbitalis              | -0.2018 |
| Left Caudal Anterior Cingulate   | -0.0050 | Right Pars Triangularis          | -1.0133 | Left Rostral Anterior Cingulate  | -0.2119 |
| Right Pars Triangularis          | -0.0053 | Left Caudal Anterior Cingulate   | -1.0455 | Right Pars Triangularis          | -0.2230 |
| Right Temporal Pole              | -0.0054 | Left Rostral Anterior Cingulate  | -1.0721 | Left Caudal Anterior Cingulate   | -0.2257 |
| Left Pars Orbitalis              | -0.0054 | Right Rostral Anterior Cingulate | -1.2675 | Right Rostral Anterior Cingulate | -0.2525 |
